# Supplementary material
Source: PubMed Central journal article supplement (PMC10282370)
Supplement: S1368980013000359sup001.pdf [file S1368980013000359sup001.pdf]

**Supplementary Table 1** Vitamin D intakes ( $\mu\text{g}/\text{day}$ ) from all sources, from food sources, from food sources excluding the added vitamin D component, from the added vitamin D component and from supplements in Irish children and teenagers

|                                  |                           | All |      |       | Boys |      |       | Girls |      |       |
|----------------------------------|---------------------------|-----|------|-------|------|------|-------|-------|------|-------|
|                                  |                           | 5-8 | 9-12 | 13-17 | 5-8  | 9-12 | 13-17 | 5-8   | 9-12 | 13-17 |
| <i>Total population</i>          | <i>n</i>                  | 296 | 298  | 441   | 145  | 148  | 224   | 151   | 150  | 217   |
| All sources                      | Mean                      | 2.8 | 2.8  | 3.2   | 2.8  | 3.0  | 3.7   | 2.7   | 2.7  | 2.7   |
|                                  | SD                        | 2.4 | 2.1  | 2.5   | 2.4  | 2.1  | 2.6   | 2.4   | 2.1  | 2.3   |
|                                  | Median                    | 1.9 | 2.1  | 2.4   | 2.0  | 2.3  | 2.7*  | 1.9   | 2.0  | 1.9   |
|                                  | P5                        | 0.8 | 0.8  | 0.8   | 0.6  | 0.7  | 1.2   | 0.8   | 0.9  | 0.6   |
|                                  | P95                       | 8.2 | 6.6  | 8.8   | 8.5  | 7.1  | 9.4   | 7.5   | 6.6  | 7.7   |
|                                  | % < EAR                   | 98  | 99   | 98    | 97   | 99   | 97    | 98    | 99   | 98    |
| Food sources (including added D) | Mean                      | 1.9 | 2.2  | 2.6   | 1.9  | 2.4  | 3.1   | 2.0   | 2.1  | 2.1   |
|                                  | SD                        | 1.1 | 1.3  | 1.8   | 1.1  | 1.4  | 1.8   | 1.2   | 1.2  | 1.5   |
|                                  | Median                    | 1.6 | 1.9  | 2.2   | 1.6  | 2.1  | 2.5*  | 1.7   | 1.9  | 1.7   |
|                                  | % of total intake         | 70  | 79   | 82    | 67   | 80   | 85    | 73    | 78   | 79    |
| Food sources (excluding added D) | Mean                      | 1.3 | 1.5  | 1.8   | 1.3  | 1.5  | 2.1   | 1.4   | 1.4  | 1.5   |
|                                  | SD                        | 0.7 | 0.7  | 1.0   | 0.7  | 0.7  | 1.0   | 0.8   | 0.7  | 0.9   |
|                                  | Median                    | 1.1 | 1.3  | 1.5   | 1.2  | 1.4  | 1.9*  | 1.1   | 1.3  | 1.3   |
|                                  | % of total intake         | 47  | 52   | 55    | 45   | 51   | 56    | 50    | 53   | 54    |
| Added D only                     | % of food sources intake  | 68  | 66   | 67    | 67   | 64   | 67    | 68    | 68   | 69    |
|                                  | Mean                      | 0.6 | 0.8  | 0.9   | 0.6  | 0.9  | 1.0   | 0.6   | 0.7  | 0.7   |
|                                  | SD                        | 0.9 | 1.1  | 1.4   | 0.9  | 1.2  | 1.5   | 0.9   | 0.9  | 1.1   |
|                                  | Median                    | 0.3 | 0.4  | 0.3   | 0.3  | 0.4  | 0.5*  | 0.3   | 0.3  | 0.2   |
| Supplements                      | % of total intake         | 23  | 27   | 27    | 22   | 29   | 28    | 23    | 25   | 25    |
|                                  | % of food sources intakes | 32  | 34   | 33    | 33   | 36   | 33    | 32    | 32   | 31    |
|                                  | Mean                      | 0.8 | 0.6  | 0.6   | 0.9  | 0.6  | 0.6   | 0.7   | 0.6  | 0.6   |
|                                  | SD                        | 2.1 | 1.6  | 1.6   | 2.1  | 1.6  | 1.6   | 2.1   | 1.7  | 1.6   |
|                                  | Median                    | 0.0 | 0.0  | 0.0   | 0.0  | 0.0  | 0.0   | 0.0   | 0.0  | 0.0   |
|                                  | % of total intake         | 30  | 21   | 18    | 33   | 20   | 15    | 27    | 22   | 21    |

\*Significantly different ( $p < 0.05$ ) from girls in the same age group

**Supplementary Table 2** Vitamin D intakes ( $\mu\text{g}/\text{day}$ ) from all sources, from food sources, from food sources excluding the added vitamin D component, from the added vitamin D component and from supplements in users of vitamin D-containing supplements in Irish children and teenagers

|                                          |                           | All  |      |       | Boys |      |       | Girls |      |       |
|------------------------------------------|---------------------------|------|------|-------|------|------|-------|-------|------|-------|
|                                          |                           | 5-8  | 9-12 | 13-17 | 5-8  | 9-12 | 13-17 | 5-8   | 9-12 | 13-17 |
| <i>Users of D-containing supplements</i> | <i>n</i>                  | 61   | 47   | 66    | 33   | 26   | 33    | 28    | 21   | 33    |
| All sources                              | Mean                      | 6.3  | 5.9  | 6.8   | 6.3  | 5.6  | 7.4   | 6.3   | 6.2  | 6.2   |
|                                          | SD                        | 2.9  | 2.7  | 2.8   | 2.8  | 2.6  | 3.0   | 3.1   | 2.9  | 2.5   |
|                                          | Median                    | 6.1  | 6.0  | 6.7   | 5.8  | 4.9  | 7.3   | 6.2   | 6.0  | 5.8   |
|                                          | P5                        | 2.7  | 2.0  | 2.5   | 2.5  | 1.6  | 2.3   | 2.3   | 2.1  | 2.4   |
|                                          | P95                       | 11.9 | 12.7 | 11.4  | 12.5 | 11.8 | 12.7  | 13.8  | 13.3 | 11.4  |
|                                          | % < EAR                   | 89   | 94   | 88    | 88   | 96   | 88    | 89    | 90   | 88    |
| Food sources (including added D)         | Mean                      | 2.2  | 2.0  | 3.0   | 2.2  | 2.1  | 3.5   | 2.3   | 1.9  | 2.4   |
|                                          | SD                        | 1.5  | 1.1  | 1.7   | 1.5  | 1.0  | 1.8   | 1.7   | 1.2  | 1.4   |
|                                          | Median                    | 1.6  | 1.8  | 2.5   | 1.6  | 2.0  | 3.4*  | 1.6   | 1.7  | 2.2   |
|                                          | % of total intake         | 35   | 35   | 44    | 35   | 38   | 48    | 37    | 31   | 39    |
| <i>Food sources (excluding added D)</i>  | Mean                      | 1.4  | 1.5  | 1.9   | 1.4  | 1.5  | 2.4   | 1.3   | 1.4  | 1.4   |
|                                          | SD                        | 0.8  | 0.9  | 1.2   | 1.0  | 0.9  | 1.4   | 0.6   | 0.9  | 0.5   |
|                                          | Median                    | 1.1  | 1.3  | 1.7   | 1.3  | 1.3  | 2.3*  | 1.1   | 1.2  | 1.4   |
|                                          | % of total intake         | 22   | 25   | 29    | 23   | 27   | 33    | 20    | 23   | 23    |
| <i>Added D only</i>                      | % of food sources intakes | 61   | 72   | 65    | 67   | 72   | 69    | 55    | 72   | 59    |
|                                          | Mean                      | 0.9  | 0.6  | 1.0   | 0.7  | 0.6  | 1.1   | 1.0   | 0.5  | 1.0   |
|                                          | SD                        | 1.3  | 0.6  | 1.3   | 1.2  | 0.6  | 1.4   | 1.4   | 0.6  | 1.3   |
|                                          | Median                    | 0.3  | 0.4  | 0.5   | 1.3  | 1.3  | 0.5   | 1.1   | 1.2  | 0.4   |
|                                          | % of total intake         | 14   | 10   | 15    | 12   | 11   | 15    | 17    | 9    | 16    |
| Supplements                              | % of food sources intakes | 39   | 28   | 35    | 33   | 28   | 31    | 45    | 28   | 41    |
|                                          | Mean                      | 4.1  | 3.8  | 3.8   | 4.1  | 3.5  | 3.8   | 4.0   | 4.3  | 3.8   |
|                                          | SD                        | 2.8  | 2.2  | 2.2   | 2.4  | 2.1  | 2.3   | 3.2   | 2.3  | 2.1   |
|                                          | Median                    | 4.3  | 4.3  | 3.7   | 3.6  | 3.2  | 3.8   | 4.6   | 4.3  | 3.6   |
|                                          | % of total intake         | 65   | 65   | 56    | 65   | 62   | 52    | 63    | 69   | 61    |

\*Significantly different ( $p < 0.05$ ) from girls in the same age group

**Supplementary Table 3** Vitamin D intakes ( $\mu\text{g}/\text{day}$ ) from all food sources, from food sources excluding the added vitamin D component and from the added vitamin D component in non-users of vitamin D-containing supplements in Irish children and teenagers

|                                           |                   | All |      |       | Boys |      |       | Girls |      |       |
|-------------------------------------------|-------------------|-----|------|-------|------|------|-------|-------|------|-------|
|                                           |                   | 5-8 | 9-12 | 13-17 | 5-8  | 9-12 | 13-17 | 5-8   | 9-12 | 13-17 |
| <i>D-fortified food consumers</i>         | <i>n</i>          | 167 | 171  | 231   | 74   | 80   | 126   | 93    | 91   | 105   |
| Food sources                              | Mean              | 2.1 | 2.6  | 3.1   | 2.1  | 3.0  | 3.5   | 2.1   | 2.4  | 2.6   |
|                                           | SD                | 1.0 | 1.4  | 1.9   | 1.0  | 1.5  | 2.0   | 1.1   | 1.2  | 1.8   |
|                                           | Median            | 1.9 | 2.2  | 2.5   | 2.0  | 2.5* | 2.9*  | 1.9   | 2.0  | 2.2   |
|                                           | P5                | 1.0 | 1.0  | 1.1   | 0.9  | 1.0  | 1.5   | 0.9   | 1.0  | 0.8   |
|                                           | P95               | 4.2 | 5.5  | 7.1   | 4.1  | 5.9  | 7.5   | 4.3   | 5.1  | 6.8   |
|                                           | % < EAR           | 100 | 100  | 99    | 100  | 100  | 98    | 100   | 100  | 100   |
| <i>Food sources (excluding added D)</i>   | Mean              | 1.3 | 1.5  | 1.8   | 1.3  | 1.6  | 1.9   | 1.4   | 1.4  | 1.6   |
|                                           | SD                | 0.8 | 0.7  | 1.0   | 0.6  | 0.7  | 0.8   | 0.9   | 0.8  | 1.1   |
|                                           | Median            | 1.1 | 1.4  | 1.5   | 1.1  | 1.4  | 1.9*  | 1.2   | 1.3  | 1.3   |
|                                           | % of total intake | 63  | 56   | 57    | 59   | 53   | 55    | 66    | 60   | 59    |
| <i>Added D only</i>                       | Mean              | 0.8 | 1.2  | 1.3   | 0.9  | 1.4  | 1.6   | 0.7   | 0.9  | 1.1   |
|                                           | SD                | 0.8 | 1.2  | 1.5   | 0.8  | 1.3  | 1.7   | 0.7   | 1.0  | 1.2   |
|                                           | Median            | 0.6 | 0.8  | 0.8   | 0.6  | 1.0* | 1.0*  | 0.5   | 0.6  | 0.6   |
|                                           | % of total intake | 37  | 44   | 43    | 41   | 47   | 45    | 34    | 40   | 41    |
| <i>Non-consumers of D-fortified foods</i> | <i>n</i>          | 68  | 80   | 144   | 38   | 42   | 65    | 30    | 38   | 79    |
| Food sources (excluding added D)          | Mean              | 1.2 | 1.4  | 1.7   | 1.1  | 1.4  | 2.2   | 1.3   | 1.4  | 1.4   |
|                                           | SD                | 0.5 | 0.7  | 1.0   | 0.4  | 0.7  | 1.1   | 0.6   | 0.6  | 0.8   |
|                                           | Median            | 1.2 | 1.2  | 1.4   | 1.2  | 1.3  | 1.9*  | 1.2   | 1.2  | 1.2   |
|                                           | P5                | 0.5 | 0.5  | 0.6   | 0.4  | 0.5  | 0.9   | 0.5   | 0.5  | 0.4   |
|                                           | P95               | 2.1 | 2.7  | 3.6   | 2.0  | 2.7  | 4.1   | 2.7   | 2.8  | 2.8   |
|                                           | % < EAR           | 100 | 100  | 100   | 100  | 100  | 100   | 100   | 100  | 100   |

\*Significantly different ( $p < 0.05$ ) from girls in the same age group

**Supplementary Table 4** Mean percentage (and quantitative) contribution of food groups to vitamin D intakes in the total population and in users of vitamin D-containing supplements in Irish children and teenagers

|                                     | Total population (all sources) |          |          | Users of vitamin D-containing supplements |          |          |
|-------------------------------------|--------------------------------|----------|----------|-------------------------------------------|----------|----------|
|                                     | 5-8                            | 9-12     | 13-17    | 5-8                                       | 9-12     | 13-17    |
|                                     | % (µg)                         | % (µg)   | % (µg)   | % (µg)                                    | % (µg)   | % (µg)   |
| <i>Total number of participants</i> | 296                            | 298      | 441      | 61                                        | 47       | 66       |
| Meat and meat products              | 16 (0.4)                       | 18 (0.5) | 22 (0.7) | 7 (0.4)                                   | 8 (0.5)  | 10 (0.7) |
| <i>of which:</i>                    |                                |          |          |                                           |          |          |
| Beef and beef dishes                | 3 (0.1)                        | 4 (0.1)  | 5 (0.2)  | 1 (0.1)                                   | 1 (0.1)  | 2 (0.2)  |
| Chicken and chicken dishes          | 2 (0.1)                        | 2 (0.1)  | 4 (0.1)  | 1 (0.1)                                   | 1 (0.1)  | 2 (0.1)  |
| Bacon and ham                       | 3 (0.1)                        | 3 (0.1)  | 4 (0.1)  | 1 (0.1)                                   | 1 (0.1)  | 2 (0.1)  |
| <i>of which:</i>                    |                                |          |          |                                           |          |          |
| Ham                                 | 2 (0.1)                        | 2 (0.1)  | 2 (0.1)  | 1 (0.1)                                   | 1 (0.1)  | 2 (0.1)  |
| Burgers and kebabs                  | 1 (0.0)                        | 2 (0.1)  | 2 (0.1)  | 0 (0.0)                                   | 2 (0.1)  | 1 (0.1)  |
| Sausages                            | 4 (0.1)                        | 4 (0.1)  | 3 (0.1)  | 2 (0.1)                                   | 1 (0.1)  | 2 (0.1)  |
| Fish and fish dishes                | 6 (0.2)                        | 7 (0.2)  | 7 (0.2)  | 3 (0.2)                                   | 5 (0.3)  | 4 (0.3)  |
| <i>of which:</i>                    |                                |          |          |                                           |          |          |
| Oily fish                           | 3 (0.1)                        | 3 (0.1)  | 4 (0.1)  | 2 (0.1)                                   | 2 (0.1)  | 3 (0.2)  |
| <i>of which:</i>                    |                                |          |          |                                           |          |          |
| Salmon, fresh                       | 1 (0.0)                        | 2 (0.0)  | 2 (0.0)  | 1 (0.1)                                   | 1 (0.0)  | 2 (0.1)  |
| Salmon, smoked                      | 1 (0.0)                        | 1 (0.0)  | 2 (0.1)  | 0 (0.0)                                   | 1 (0.0)  | 0 (0.0)  |
| White fish                          | 2 (0.1)                        | 3 (0.1)  | 2 (0.1)  | 1 (0.1)                                   | 2 (0.1)  | 1 (0.1)  |
| <i>of which:</i>                    |                                |          |          |                                           |          |          |
| Tuna, canned                        | 1 (0.0)                        | 2 (0.1)  | 1 (0.0)  | 1 (0.1)                                   | 1 (0.1)  | 0 (0.0)  |
| Cod, fresh                          | 0 (0.0)                        | 0 (0.0)  | 1 (0.0)  | 0 (0.0)                                   | 0 (0.0)  | 1 (0.0)  |
| Milk and yoghurts                   | 13 (0.4)                       | 13 (0.4) | 10 (0.3) | 8 (0.5)                                   | 5 (0.3)  | 6 (0.4)  |
| <i>of which:</i>                    |                                |          |          |                                           |          |          |
| Reduced fat milk, fortified         | 3 (0.1)                        | 2 (0.1)  | 3 (0.1)  | 3 (0.2)                                   | 1 (0.0)  | 2 (0.1)  |
| Whole milk, unfortified             | 9 (0.2)                        | 8 (0.2)  | 6 (0.2)  | 4 (0.3)                                   | 3 (0.2)  | 3 (0.2)  |
| Reduced fat milk, unfortified       | 0 (0.0)                        | 1 (0.0)  | 1 (0.0)  | 0 (0.0)                                   | 0 (0.0)  | 1 (0.0)  |
| Butter and fat spreads              | 7 (0.2)                        | 7 (0.2)  | 10 (0.3) | 3 (0.2)                                   | 3 (0.2)  | 5 (0.3)  |
| <i>of which:</i>                    |                                |          |          |                                           |          |          |
| Fat spreads, fortified              | 6 (0.2)                        | 6 (0.2)  | 8 (0.3)  | 3 (0.2)                                   | 3 (0.2)  | 4 (0.3)  |
| Nutritional supplements             | 30 (0.8)                       | 21 (0.6) | 18 (0.6) | 65 (4.1)                                  | 65 (3.8) | 56 (3.8) |
| <i>of which:</i>                    |                                |          |          |                                           |          |          |
| Multinutrient                       | 27 (0.8)                       | 19 (0.5) | 13 (0.4) | 58 (3.7)                                  | 59 (3.5) | 40 (2.7) |
| Cod liver oil                       | 3 (0.1)                        | 2 (0.1)  | 5 (0.2)  | 6 (0.4)                                   | 6 (0.4)  | 16 (1.1) |
| Calcium plus D                      | 0 (0.0)                        | 0 (0.0)  | 0 (0.0)  | 1 (0.0)                                   | 0 (0.0)  | 0 (0.0)  |
| Breakfast cereals                   | 12 (0.3)                       | 17 (0.5) | 15 (0.5) | 8 (0.5)                                   | 6 (0.4)  | 9 (0.6)  |
| <i>of which:</i>                    |                                |          |          |                                           |          |          |
| RTEBC                               | 12 (0.3)                       | 17 (0.5) | 15 (0.5) | 8 (0.5)                                   | 6 (0.4)  | 8 (0.6)  |
| Eggs and egg dishes                 | 5 (0.1)                        | 5 (0.1)  | 5 (0.1)  | 2 (0.1)                                   | 2 (0.1)  | 2 (0.1)  |
| Biscuits, cakes and pastries        | 2 (0.1)                        | 3 (0.1)  | 3 (0.1)  | 1 (0.1)                                   | 2 (0.1)  | 2 (0.1)  |
| Other                               | 8 (0.2)                        | 9 (0.2)  | 10 (0.3) | 5 (0.3)                                   | 5 (0.3)  | 6 (0.4)  |
| Mean daily intake (µg)              | 2.8                            | 2.8      | 3.2      | 6.3                                       | 5.9      | 6.8      |
